# Supplementary material
Source: PubMed Central journal article supplement (PMC6209557)
Supplement: CONC-25-e461-s001.pdf [file CONC-25-e461-s001.pdf]

## **Supplemental Materials for**

### **Canadian evidence-based guidelines for the first-line treatment of chronic lymphocytic leukemia**

C. Owen MD\*, A.S. Gerrie MD†, V. Banerji MD‡, S. Assouline MD§, C. Chen MD||, K.S. Robinson MD#, E. Lye BSc\*\*, G. Fraser MD††

#### **Listing of Supplemental Material(s):**

Supplemental Table 1: Patient Fitness Evaluation

Supplemental Table 2: RCTs – First-line Chemotherapy (pre-rituximab)

Supplemental Table 3: Phase II Studies – First-line Therapy

Supplemental Table 4: RCTs – Maintenance Drug Therapy After First-line Treatment

Supplemental Table 5: Phase II Studies – Maintenance and/or Consolidation Drug Therapy After First-line Treatment

Supplemental Table 6: RCTs – Autologous Transplant After First-line Treatment

Corresponding author:

Carolyn Owen  
603 South Tower  
Foothills Medical Centre  
1403-29 St NW, Calgary, AB, T2N 2T9  
[Carolyn.Owen@albertahealthservices.ca](mailto:Carolyn.Owen@albertahealthservices.ca)

**Supplemental Table 1: Patient Fitness Evaluation**

| Study                                  | Subgroup analysis                                                                                                                                                                                                                                                                                                                                                                                                                                                                                                                                                                                                                                                |
|----------------------------------------|------------------------------------------------------------------------------------------------------------------------------------------------------------------------------------------------------------------------------------------------------------------------------------------------------------------------------------------------------------------------------------------------------------------------------------------------------------------------------------------------------------------------------------------------------------------------------------------------------------------------------------------------------------------|
| <b>CLL8<br/>FCR vs FC<br/>[1]</b>      | <ul style="list-style-type: none"> <li>No difference in OS or PFS by age.</li> <li>Increased grade 3/4 toxicities in patients <math>\geq 65</math> years</li> <li>Increased grade 3/4 toxicities with moderate/high-grade comorbidity in at least one organ system vs low-grade comorbidity (81% vs 66%; <math>p &lt; 0.001</math>)</li> </ul>                                                                                                                                                                                                                                                                                                                   |
| <b>CLL10<br/>BR vs FCR<br/>[2]</b>     | <ul style="list-style-type: none"> <li>PFS longer with FCR in patients <math>&lt; 65</math> years, but not in patients <math>\geq 65</math> years.</li> <li>No difference in PFS between FCR and BR in patients with CIRS 4-6 or <math>&gt; 1</math> CIRS item.</li> <li>Increased risk of infection with FCR for patients <math>\geq 65</math> years (47.7% vs 20.6%; <math>p &lt; 0.001</math>)</li> </ul>                                                                                                                                                                                                                                                     |
| <b>CLL4/5<br/>metaanalysis<br/>[3]</b> | <ul style="list-style-type: none"> <li>Patients with <math>\geq 2</math> comorbidities had shorter median OS than patients with <math>&lt; 2</math> comorbidities (71.7 months vs 90.2 months; <math>p &lt; 0.001</math>); significant in both younger (CLL4) and older (CLL5) patients)</li> <li>Specific comorbidities predicting overall survival could not be identified</li> <li>Comorbidities did not influence myelotoxicity, infection or any SAEs.</li> <li>Doses of study drugs were more frequently reduced in patients with <math>\geq 2</math> comorbidities vs <math>&lt; 2</math> comorbidities (40% vs 31%; <math>P &lt; 0.05</math>)</li> </ul> |
| <b>Metaanalysis [4]</b>                | <ul style="list-style-type: none"> <li>Fludarabine does not confer significant benefit in PFS nor OS to adults <math>\geq 70</math> years</li> <li>A trend toward poorer OS with fludarabine versus chlorambucil in subgroup <math>\geq 70</math> years</li> <li>Addition of rituximab to fludarabine-containing regimens significantly improves both PFS and OS in younger and older patients</li> </ul>                                                                                                                                                                                                                                                        |
| <b>FCR<br/>[5, 6]</b>                  | <ul style="list-style-type: none"> <li>Age <math>\geq 70</math> years independently associated with inferior response to FCR</li> <li>Patients <math>\geq 70</math> years less likely to complete 6 cycles of therapy (46% vs 79%; <math>p &lt; 0.001</math>)</li> <li>Dose reductions more common in patients <math>&gt; 60</math> years</li> <li>CrCl 30-70mg/ml: more cytopenias, dose reductions and early treatment discontinuations.</li> </ul>                                                                                                                                                                                                            |

| Study                          | Subgroup analysis                                                                                                                                                                                                                                                                                                                                                                                                                                     |
|--------------------------------|-------------------------------------------------------------------------------------------------------------------------------------------------------------------------------------------------------------------------------------------------------------------------------------------------------------------------------------------------------------------------------------------------------------------------------------------------------|
| <b>F arm of CALGB 9011 [7]</b> | <ul style="list-style-type: none"> <li>No association between age (<math>\geq 70</math> vs <math>&lt; 70</math> years) and incidence of hematologic toxicity or infection during cycle 1 of treatment</li> <li>Strong association between CrCl and time-to-toxicity endpoint.</li> <li>Patients with CrCl <math>&lt; 80</math> ml/min had increased incidence of toxicity during treatment course (<math>P &lt; 0.0001</math>)</li> </ul>             |
| <b>BR [8]</b>                  | <ul style="list-style-type: none"> <li>No difference in PFS for patients with CrCl <math>\geq 70</math> ml/min vs CrCl <math>&lt; 70</math> ml/min</li> <li>No difference in PFS for patients <math>\geq 70</math> years vs <math>&lt; 70</math> years</li> </ul>                                                                                                                                                                                     |
| <b>PCR [9, 10]</b>             | <ul style="list-style-type: none"> <li>No difference in PFS for patients <math>\geq 70</math> years vs <math>&lt; 70</math> years</li> <li>No difference in number of treatment cycles, dose reductions, or grade <math>\geq 3</math> toxicities for patients <math>\geq 70</math> years vs <math>&lt; 70</math> years</li> <li>No difference in PFS in patients with CrCl <math>\geq 70</math> ml/min vs CrCl <math>&lt; 70</math> ml/min</li> </ul> |

BR, bendamustine+rituximab; Clb, chlorambucil; CrCl, Creatinine clearance; F, fludarabine; FC, fludarabine+cyclophosphamide; FCR, fludarabine+cyclophosphamide+rituximab; GCLLSG, German CLL Study Group; OS, overall survival; PCR, pentostatin+cyclophosphamide+rituximab; PFS, progression free survival

**Supplemental Table 2: RCTs – First-line Chemotherapy (pre-rituximab)**

| Reference                     | Treatment      | Median Follow up | Patients                                           | N   | Response                                                                                                                                              | PFS                                                                                   | OS                                                                              | Toxicity (Grade ≥ 3)                                                                                                                                         |
|-------------------------------|----------------|------------------|----------------------------------------------------|-----|-------------------------------------------------------------------------------------------------------------------------------------------------------|---------------------------------------------------------------------------------------|---------------------------------------------------------------------------------|--------------------------------------------------------------------------------------------------------------------------------------------------------------|
| <b>[11-13]<br/>CALGB 9011</b> | F vs Clb       | 62 months        | Median age: 63 years (32-89)<br>ECOG: 0-2          | 509 | ORR: 63% vs 37%,<br>$p < 0.001$<br>CR: 20% vs 4%,<br>$p < 0.001$                                                                                      | Median: 20 months vs 14 months, $p < 0.001$<br><br>At 4 years: 21% vs 6%, $p < 0.001$ | Median: 66 months vs 56 months, $p = 0.1$<br>At 8 years: 31% vs 19%, $p = 0.07$ | All: 55% vs 44%<br>$p = 0.05$<br>Major infection: 29% vs 17%; $p = 0.008$<br><br>Secondary malignancies similar in F vs Clb, except t-MN > in F arm          |
| <b>[14]<br/>LRF CLL4</b>      | FC vs F vs Clb | N/R              | Median age: 65 years (35-86)                       | 777 | ORR: 94% vs 80% vs 72%<br>$p < 0.0001$ (FC vs F)<br>$p = 0.04$ (F vs Clb)<br>CR: 38% vs 15% vs 7%<br>$p < 0.0001$ (FC vs F)<br>$p = 0.006$ (F vs Clb) | At 5 years: 36% vs 10% vs 10%<br>$p < 0.00005$ (FC vs F)<br>NS (F vs Clb)             | NS                                                                              | Neutropenia: 56% vs 41% vs 28%, $p < 0.0001$<br>Admission (> 1day): 38% vs 36% vs 22%<br>$p < 0.0001$<br>Nausea/vomiting: 53% vs 28% vs 33%,<br>$p < 0.0001$ |
| <b>[15]<br/>NAIT-E2997</b>    | F vs FC        | N/R              | Median age: 61 years (33-86)<br>PS > 2<br>ECOG 0-2 | 278 | ORR: 59.5% vs 74.3%<br>$p = 0.013$<br>CR: 4.6% vs 23.4%<br>$p < 0.001$                                                                                | Median: 19.2 months vs 31.6 months,<br>$p < 0.0001$                                   | NS                                                                              | All: 33% vs 50%,<br>$p = 0.007$<br><br>No difference in severe infection                                                                                     |

| Reference           | Treatment | Median Follow up | Patients                                              | N   | Response                                                                                                                  | PFS                                                                                                              | OS                                 | Toxicity (Grade ≥ 3)                                                                                                                                      |
|---------------------|-----------|------------------|-------------------------------------------------------|-----|---------------------------------------------------------------------------------------------------------------------------|------------------------------------------------------------------------------------------------------------------|------------------------------------|-----------------------------------------------------------------------------------------------------------------------------------------------------------|
| [16]<br>GCLLSG-CLL4 | F vs FC   | N/R              | Age: ≤ 65 years<br>Median age: 58 years<br>ECOG 0-2   | 375 | ORR: 83% vs 94%<br>$p = 0.01$<br>CR: 7% vs 24%<br>$p < 0.001$                                                             | Median: 20 months vs 48 months, $p = 0.001$                                                                      | At 3 years: 80.7% vs 80.3%,<br>NS  | All: 54% vs 72.6%, $p = 0.001$<br>Myelotoxicity: 40% vs 64%, $p = 0.001$<br>Leukocytopenia: 26% vs 56%, $p < 0.001$<br>No difference in rate of infection |
| [17]<br>GCLLSG-CLL5 | F vs Clb  | N/R              | Age: 65-80 years<br>Median age: 70 years<br>ECOG: 0-2 | 193 | ORR: 72% vs 51%,<br>$p = 0.003$<br>CR: 7% vs 0%<br>$p = 0.01$<br>TTF: 18 months vs 11 months<br>$p = 0.004$               | Median: 18 months vs 19 months, NS                                                                               | Median: 64 months vs 46 months, NS | Myelotoxicity: 42% vs 23%<br>$p = 0.005$                                                                                                                  |
| [18, 19]            | Clb vs B  | 54 months        | Age: ≤ 75 years<br>WHO PS: 0-2                        | 319 | ORR: 31% vs 68%,<br>$p < 0.0001$<br>CR: 10.8% vs 21%,<br>$p$ N/R<br>Median TTNT: 10.1 months vs 31.7 months, $p < 0.0001$ | Median: 8.8 months vs 21.2 months,<br>$p < 0.0001$<br>Difference sustained in patients < 65 years and ≥ 65 years | Median: 78.8 months vs NR, NS      | Neutropenia: 10.6% vs 23%, $p =$ N/R<br>Leukopenia: 1.3% vs 14.3%, $p =$ N/R                                                                              |

| Reference             | Treatment                  | Median Follow up | Patients                                                                                               | N   | Response                                                                                                                                                                 | PFS                                                           | OS                                              | Toxicity (Grade ≥ 3)                                                                                                                   |
|-----------------------|----------------------------|------------------|--------------------------------------------------------------------------------------------------------|-----|--------------------------------------------------------------------------------------------------------------------------------------------------------------------------|---------------------------------------------------------------|-------------------------------------------------|----------------------------------------------------------------------------------------------------------------------------------------|
| [20]                  | F vs CAP vs CHOP           | 70 months        | Age: < 75 Years<br>Median age: N/R                                                                     | 938 | ORR: 71% vs 58% vs 71%, $p < 0.0001$ (for F vs CAP and CHOP vs CAP)<br>CR: 40% vs 15% vs 30%, $p = 0.003$ (for F vs CAP and CHOP vs CAP)                                 | Median: 31.7 months vs 27.7 months vs 29.5 months, $p = 0.09$ | Median: 69 months vs 70 months vs 67 months, NS | Neutropenia: 38% vs 30% vs 38%, $p = 0.06$<br>Thrombocytopenia 15% vs 7% vs 8%, $p = 0.003$<br>Alopecia: 0 vs 15% vs 16%, $p < 0.0001$ |
| [21]                  | Clb+theo vs Clb            | 48 months (mean) | Median age:<br>Clb+theo: 58 years (44-76)<br>Clb: 61 years (40-74)                                     | 210 | PR: 35.7% vs 34.9%, $p = N/R$<br>CR: 25.7% vs 12.8%, $p = 0.01$                                                                                                          | Median : 44 months vs 30 months , $p = 0.006$                 | Median : 56 months vs 55 months, $p = 0.371$    | Rates of toxicities N/R                                                                                                                |
| [22, 23]<br>PALG-CLL2 | 2-CdA vs 2-CdAC vs 2-CdACM | N/R              | Median age:<br>2-CdA: 61 years (28-81)<br>2-CdAC: 62 years (28-80)<br>2-CdACM: 59 (33-79)<br>WHO-PS <4 | 508 | ORR: 78% vs 83% vs 80%, $p = 0.1$ (2-CdA vs 2-CdAC), $p = 0.4$ (2-CdA vs 2-CdACM)<br>CR: 21% vs 29% vs 36%, $p = 0.08$ (2-CdA vs 2-CdAC), $p = 0.004$ (2-CdA vs 2-CdACM) | Median: 23.5 months vs 22.4 months vs 23.6 months, $p = 0.49$ | Median: 51.2 months vs NR vs NR, $p = 0.73$     | Neutropenia: 20% vs 32% vs 38%, $p = 0.01$ (2-CdA vs 2-CdAC)<br>$p = 0.004$ (2-CdA vs 2-CdACM)                                         |

| Reference         | Treatment      | Median Follow up | Patients                                                                      | N   | Response                                                                      | PFS                                               | OS                                                     | Toxicity (Grade ≥ 3)                                                                                                                 |
|-------------------|----------------|------------------|-------------------------------------------------------------------------------|-----|-------------------------------------------------------------------------------|---------------------------------------------------|--------------------------------------------------------|--------------------------------------------------------------------------------------------------------------------------------------|
| [24]              | 2-CdAP vs ClbP | N/R              | Median age: 2-CdA+P: 61 years (31-92)<br>Clb+P: 62 years (31-88)<br>WHO-PS <4 | 229 | ORR: 87% vs 57%,<br><i>P</i> = 0.0001<br>CR: 47% vs 12%,<br><i>p</i> = 0.0001 | At 24 months:<br>46% vs 33%<br><i>p</i> = 0.01    | At 24 months:<br>78% vs 82%, <i>p</i> = 0.6            | Neutropenia (all):<br>23% vs 11%, <i>p</i> = 0.02<br>Infection (all): 56% vs 40%, <i>p</i> = 0.02                                    |
| [25]<br>PALG-CLL3 | 2-CdAC vs FC   | 38 months        | Median age: 2-CdAC: 58 years (37-81)<br>FC: 59 years (27-81)<br>WHO-PS <4     | 395 | ORR: 88% vs 82%,<br><i>p</i> = 0.11<br>CR: 47% vs 46%<br><i>p</i> = 0.25      | Median: 2.34 years vs 2.27 years, <i>p</i> = 0.51 | 4-year estimate:<br>62.4% vs 60.6%,<br><i>p</i> = 0.16 | Neutropenia: 20% vs 21%, <i>p</i> = 0.81<br>Thrombocytopenia: 12% vs 11%, <i>p</i> = 0.62<br>Infections: 28% vs 27%, <i>p</i> = 0.84 |
| [26]<br>CAM307    | A vs Clb       | 24.6 months      | Median age: A: 59 years (35-86)<br>Clb: 60 years (36-83)<br>WHO PS 0-2        | 297 | ORR: 83% vs 55%,<br><i>p</i> < 0.0001<br>CR: 24% vs 2%,<br><i>p</i> < 0.0001  | HR: 0.58, 95% CI (0.43-0.77)<br><i>p</i> = 0.0001 | Median: NR vs NR                                       | Infusion-related: 15.7% vs 0                                                                                                         |

2-CdA, cladribine; 2-CdAC, cladribine+cyclophosphamide; 2-CdACM, cladribine+cyclophosphamide+mitoxantrone; 2-CdAP, cladribine+prednisone; A, alemtuzumab; B, bendamustine; CAP, cyclophosphamide+prednisone+doxorubicin; CHOP, cyclophosphamide+vincristine+prednisone+doxorubicin; Clb, chlorambucil; Clb+theo, chlorambucil+theophylline; ClbP, chlorambucil+prednisone; CR, complete response rate; F, fludarabine; FC, fludarabine+cyclophosphamide; GCLLSG, German CLL Study Group; N/R, not reported; NR, not reached; NS, not significant; Ob, obinutuzumab; Obs, observation; Of, ofatumumab; ORR, overall response rate; OS, overall survival; PC, pentostatin+cyclophosphamide; PCOf, pentostatin+cyclophosphamide+ofatumumab; PCR, pentostatin+cyclophosphamide+rituximab; PFS, progression free survival; PR, partial response rate RCT, randomized controlled trial; Theo, theophylline

**Supplemental Table 3: Phase II Studies – First-line Therapy**

| <b>Chemoimmunotherapy</b> |                  |                         |                                             |          |                                                                         |                                                      |                                                      |                                                                                  |
|---------------------------|------------------|-------------------------|---------------------------------------------|----------|-------------------------------------------------------------------------|------------------------------------------------------|------------------------------------------------------|----------------------------------------------------------------------------------|
| <b>Reference</b>          | <b>Treatment</b> | <b>Median Follow up</b> | <b>Patients</b>                             | <b>N</b> | <b>Response</b>                                                         | <b>PFS</b>                                           | <b>OS</b>                                            | <b>Toxicity (Grade ≥ 3)</b>                                                      |
| <b>[5, 6, 27]</b>         | FCR              | 12.8 years              | Median age: 57 years (17-86)                | 300      | ORR: 95%<br>CR: 72%                                                     | Median: 6.4 years<br><br>At 12.8 years: 30.9%        | Median: 12.7 years<br><br>At 6 years: 77%            | Neutropenia: 52%<br>Infection: 2%<br><br>2 <sup>nd</sup> cancers in 101 patients |
| <b>[28, 29]</b>           | FCR-lite         | N/R                     | Median age: 58 (36-85)                      | 63       | ORR : 93%<br>CR : 73%                                                   | At 5 years : 66.9%                                   | At 5 years : 85.5%                                   | Infection: 6%<br>MDS: 3 patients                                                 |
| <b>[30]</b>               | FCR-lite+Len     | 17.4 months             | Median age: 62.5 years (42-75)<br>ECOG 0-2  | 20       | ORR: 90%<br>CR: 75%                                                     | At 17.4 months: 95%                                  | At 17.4 months: 95%                                  | Leukopenia: 20.3%<br>Neutropenia: 51.6%                                          |
| <b>[31]</b>               | FCR + GM-CSF     | 56 months               | Median age: 55 years (35-77)<br>ECOG 0-2    | 60       | ORR: 100%<br>CR: 75%                                                    | Median: NR                                           | Median: NR                                           | Neutropenia: 83%<br>Infection: 16%                                               |
| <b>[32]</b>               | FCR-M            | 38.5 months             | Age: < 70 years<br>ECOG 0-2                 | 30       | ORR: 93%<br>CR: 83%                                                     | Median: NR                                           | Median: NR                                           | Neutropenia: 67%<br>No infection requiring hospitalization                       |
| <b>[33]</b>               | FCR-A            | 25 months               | Median age: 59 years (42-69)                | 60       | ORR: 92%<br>CR: 70%                                                     | Median: 38 months                                    | Median: NR                                           | Neutropenia: 33%<br>Infection: 11%                                               |
| <b>[34]</b>               | FER              | 34 months               | Median age: 65                              | 38       | ORR: 95%<br>CR: 63%                                                     | Median: 61 months                                    | Median: NR                                           | Neutropenia: 56%<br>No infection (grade ≥ 3)                                     |
| <b>[35, 36]</b>           | FR-con<br>FR-seq | 117 months              | Median age: 65 years (36-86)<br>CALGB PS ≤3 | 104      | ORR:<br>FR-con: 90%<br>FR-seq: 77%<br>CR:<br>FR-con: 33%<br>FR-seq: 15% | At 5 years (all): 28%<br><br>Median (all): 42 months | At 5 years (all): 71%<br><br>Median (all): 85 months | Neutropenia: 76% vs 39%                                                          |



| Reference | Treatment | Median Follow up | Patients                                                                             | N   | Response                | PFS                                | OS                                   | Toxicity (Grade ≥ 3)                                                                        |
|-----------|-----------|------------------|--------------------------------------------------------------------------------------|-----|-------------------------|------------------------------------|--------------------------------------|---------------------------------------------------------------------------------------------|
| [37]      | FA        | nr               | Age ≤ 60 years<br>Presence of high-risk genetic features                             | 45  | ORR: 95%<br>CR: 30%     | At 3 years:<br>42.5%               | At 3 years:<br>79.9%                 | Neutropenia: 33%<br>Infection: 11%                                                          |
| [9, 10]   | PCR       | 26 months        | Median age: 63 years (38-80)<br>≥ 70 years: 28%<br>ECOG ≤ 3                          | 64  | ORR: 91%<br>CR: 41%     | Median: 32.6 months                | Median: NR                           | All: 55%<br>Neutropenia: 44%                                                                |
| [38]      | PCof      | 24 months        | Median age: 65 (50-83)<br>ECOG ≤ 2                                                   | 48  | ORR: 96%<br>CR: 46%     | At 24 months:<br>89%               | Median: NR                           | Hematologic toxicity: 27%<br>Nonhematologic toxicity: 23%                                   |
| [39]      | PCof      | 22 months        | Age ≥ 65<br>Median age: 72 years (65-83)<br>ECOG 0-2<br>CIRS ≤ 6<br>CrCl ≥ 70 ml/min | 47  | ORR: 89.4%<br>CR: 51.1% | Median: NR<br>At 24 months:<br>69% | Median: NR<br>At 24 months:<br>97.9% | Neutropenia: 53.2%<br>Hospitalization: 6.4%                                                 |
| [40]      | P+R       | 14 months        | Median age: 65 (45-81)<br>ECOG ≤ 3                                                   | 33  | ORR: 76%<br>CR: 27%     | 24 months:<br>89%                  | Median: NR                           | Hematologic toxicity: 12%<br>Nonhematologic toxicity: 15%                                   |
| [8]       | BR        | 27 months        | Median age: 64 years (34-78)<br>ECOG ≤ 2                                             | 117 | ORR: 88%<br>CR: 23%     | Median EFS:<br>33.9 months         | Median: NR<br>At 27 months:<br>90.5% | Hematologic toxicity: 52.1%<br>Nonhematologic toxicity: 41.6%                               |
| [41]      | ClbR      | 30 months        | Median age: 70 years (43 to 86)<br>Median no. of comorbidities: 7 (0-20)             | 100 | ORR: 84%<br>CR: 10%     | Median: 23.5 months                | Median: NR<br>At 30 months:<br>84%   | Neutropenia and lymphopenia: 41%<br>Leukopenia: 23%<br>Anemia: 19%<br>Thrombocytopenia: 18% |

**Monoclonal Antibody therapy**

| Reference | Treatment              | Median Follow up | Patients                                 | N  | Response                                                               | PFS                                               | OS              | Toxicity (Grade ≥ 3)                                      |
|-----------|------------------------|------------------|------------------------------------------|----|------------------------------------------------------------------------|---------------------------------------------------|-----------------|-----------------------------------------------------------|
| [42]      | R+GM-CSF               | 79 months        | Age: ≥ 70 years                          | 40 | ORR: 59%                                                               | Median: 15 months                                 | At 7 years: 67% | 2 patients experienced serious infection                  |
| [43]      | Ob (1000)<br>Ob (2000) | 20.3 months      | Median age: 67 years (34-91)<br>ECOG ≤ 2 | 80 | ORR: 49% vs 67%<br><i>p</i> = 0.08<br>CR: 5% vs 20%<br><i>p</i> < 0.05 | At 18 months: 59% vs 83%                          | Median: NR      | All: 55.0% vs 65%<br><br>Neutropenia: 30% vs 31.6%        |
| [44]      | AR-st<br>AR-lo         | 24.6 months      | Median age: 76 years (67-92)<br>ECOG ≤ 2 | 25 | ORR: 90%<br>CR: 45%                                                    | Median:<br>AR-st:12.8 months<br>AR-lo:23.3 months | Median: NR      | Neutropenia:<br>AR-st:75%<br>AR-lo:47%<br><i>p</i> = 0.15 |
| [45]      | AR                     | 58.3 months      | Median age: 58 years (28-80)<br>ECOG ≤ 2 | 30 | ORR: 70%<br>CR: 23%                                                    | At 58.3 months: 80%                               | Median: NR      | Neutropenia: 30%                                          |

**Lenalidomide**

| Reference | Treatment | Median Follow up | Patients                                             | N  | Response            | PFS                                          | OS                | Toxicity (Grade ≥ 3)                                                             |
|-----------|-----------|------------------|------------------------------------------------------|----|---------------------|----------------------------------------------|-------------------|----------------------------------------------------------------------------------|
| [46, 47]  | Len       | 48 months        | Age ≥ 65<br>Median age: 71 years (65-84)<br>ECOG 0-3 | 60 | ORR: 65%<br>CR: 15% | At 2 years: 60%<br>Median: NR                | At 4 years: 82%   | Neutropenia: 88%<br>Thrombocytopenia: 47%<br>Severe infection: 13%<br>1 fatality |
| [48, 49]  | Len       | 53.2 months      | Median age: 60 years (33-78)<br>ECOG 0-3             | 25 | ORR: 72%<br>CR: 20% | At 3 years: 64.6%<br><br>Median: 40.4 months | At 3 years: 85.3% | Neutropenia: 72%<br>Thrombocytopenia: 28%<br>Severe infection: 36%               |

| Reference | Treatment | Median Follow up | Patients                                                                                                                 | N                      | Response                                                           | PFS                                                          | OS         | Toxicity (Grade ≥ 3)                     |
|-----------|-----------|------------------|--------------------------------------------------------------------------------------------------------------------------|------------------------|--------------------------------------------------------------------|--------------------------------------------------------------|------------|------------------------------------------|
| [50]      | Len+R     | 20 months        | Arm A: < 65 years<br>Median: 57 years<br>(45-64)<br><br>Arm B: ≥ 65 years<br>Median: 70 years<br>(65-80)<br><br>ECOG 0-2 | Arm A: 40<br>Arm B: 29 | Arm A:<br>ORR: 95%<br>CR: 20%<br><br>Arm B:<br>ORR: 79%<br>CR: 10% | Arm A median:<br>19 months<br><br>Arm B median:<br>20 months | Median: NR | Neutropenia:<br>Arm A: 53%<br>Arm B: 66% |

A, alemtuzumab; AR, alemtuzumab+rituximab; BR, bendamustine+rituximab; ClbR, chlorambucil+rituximab; CR, complete response rate; CrCl, Creatinine clearance; FCA, fludarabine+cyclophosphamide+alemtuzumab; FCR, fludarabine+cyclophosphamide+rituximab; FR, fludarabine+rituximab; GM-CSF, granulocyte macrophage colony stimulating factor; Len, lenalidomide; Len+R, lenalidomide+rituximab; N/R, not reported; NR, not reached; NS, not significant; Ob, obinutuzumab; Obs, observation; ORR, overall response rate; OS, overall survival; PC, pentostatin+cyclophosphamide; PCOf, pentostatin+cyclophosphamide+ofatumumab; PCR, pentostatin+cyclophosphamide+rituximab; PFS, progression free survival; P+R, pentostatin+rituximab

#### Supplemental Table 4: RCTs - Maintenance Drug Therapy After First-line Treatment

| Reference | Induction Therapy                                                                | Maintenance Therapy | Median Follow up | Patients                                                                         | N   | Response                                          | PFS                                                                                                                            | OS | Toxicity (Grade ≥ 3)                                      |
|-----------|----------------------------------------------------------------------------------|---------------------|------------------|----------------------------------------------------------------------------------|-----|---------------------------------------------------|--------------------------------------------------------------------------------------------------------------------------------|----|-----------------------------------------------------------|
| [51]      | FCR (71%)<br>BR (21%)<br>Other (8%)<br><br>First-line (80%)<br>Second-line (20%) | R (maint) vs<br>Obs | 33.4 months      | Median age: 63<br>years (35-85)<br>ECOG 0-1<br>CR, Cri, or PR<br>after induction | 263 | Conversion<br>of PR to CR<br>or Cri: 13% vs<br>2% | Median:<br>47.0<br>months vs<br>35.5<br>months<br>$p =$<br>0.00077<br><br>Median<br>TNT: NR vs<br>47.3<br>months<br>$P=0.0051$ | NR | Neutropenia:<br>21% vs 11%<br><br>Infection: 20% vs<br>8% |

| Reference                        | Induction Therapy | Maintenance Therapy | Median Follow up                                                                | Patients                                                                                                                                      | N   | Response                                                                                                             | PFS                                                                                                    | OS                                     | Toxicity (Grade ≥ 3)                                                                                   |
|----------------------------------|-------------------|---------------------|---------------------------------------------------------------------------------|-----------------------------------------------------------------------------------------------------------------------------------------------|-----|----------------------------------------------------------------------------------------------------------------------|--------------------------------------------------------------------------------------------------------|----------------------------------------|--------------------------------------------------------------------------------------------------------|
| <b>[52]</b><br><b>(Abstract)</b> | FCR (4 cycles)    | R (maint) vs Obs    | 43.6 months                                                                     | Age ≥ 65 years;<br>Median age:<br>71.3 years<br>Fit, no del(17p)<br>PR or CR after<br>induction                                               | 409 | N/R                                                                                                                  | Median:<br>59.3<br>months vs<br>49.0<br>months<br>$p = 0.0011$<br><br>At 3 years:<br>83.0% vs<br>64.2% | At 3<br>years:<br>92.6%<br>vs<br>87.2% | Hematological<br>toxicity: 6.9% vs<br>1.9% $p = 0.027$<br>Infections:<br>18.8% vs 10.1%<br>$p = 0.036$ |
| <b>[53]</b>                      | FCR, BR, or FC    | Len (maint) vs Obs  | 17.9 months<br>(Recruitment<br>closed<br>prematurely<br>due to poor<br>accrual) | Median age: 64<br>years (57-69)<br>High risk: ≥<br>intermediate<br>MRD + IGHV-U<br>or TP53<br>aberration<br>CR, Cri, or PR<br>after induction | 85  | MRD status<br>at cycle 12:<br>Negative (7%<br>vs 0);<br>Intermediate<br>(48% vs<br>22%);<br>Positive (44%<br>vs 78%) | Median:<br>NR vs 13.3<br>months                                                                        | NE                                     | Neutropenia:<br>34% vs 6%<br>GI disorders:<br>13% vs 0<br>Infections: 15%<br>vs 9%                     |

BR, bendamustine+rituximab; Con, consolidation; CR, complete response rate; Cri, complete response with incomplete blood count recovery; FCR, fludarabine+cyclophosphamide+rituximab; IGHV-U, unmutated IGHV gene; Len, lenalidomide; Maint, maintenance; MRD, minimal residual disease; N, number of patients; N/R, not reported; NE, not evaluable; NR, not reached; Obs, observation; ORR, overall response rate; OS, overall survival; PCOf, pentostatin+cyclophosphamide+ofatumumab; PFS, progression free survival; PR, partial response rate; R, rituximab; TFS, treatment-free survival

**Supplemental Table 5: Phase II Studies – Maintenance and/or Consolidation Drug Therapy After First-line Treatment**

| Reference | Induction Therapy | Maintenance Therapy    | Median Follow up | Patients                                                                                       | N                                                        | Response                                                                                                                 | PFS                                                                             | OS                                  | Toxicity (Grade ≥ 3)                                                |
|-----------|-------------------|------------------------|------------------|------------------------------------------------------------------------------------------------|----------------------------------------------------------|--------------------------------------------------------------------------------------------------------------------------|---------------------------------------------------------------------------------|-------------------------------------|---------------------------------------------------------------------|
| [54, 55]  | FCR-M             | R (maint)              | 48.7 months      | Median age: 60 (35-70)<br><br>CR or PR after induction                                         | 64                                                       | CR (MRD-neg): 40.6%<br>CR (MRD-pos): 40.6%<br>PR: 4.8%<br>TF: 14%<br><br>Improved response: 21%                          | At 4 years: 74.8%<br><br>Median: NR                                             | At 4 years: 93.7%<br><br>Median: NR | 2 deaths due to adverse events<br><br>Serious infection: 25%        |
| [56]      | FR                | R (con + maint) vs Obs | 26 months        | Median age: 60 (35-70)<br><br>CR or PR (MRD-pos) after induction: R or Obs<br><br>MRD-neg: Obs | 71<br><br>MRD-pos: 28 R vs 18 Obs<br><br>MRD-neg: 25 Obs | N/R                                                                                                                      | At 5 years: 87% vs 32%<br>$p = 0.001$                                           | At 5 years: 90% for all patients    | Few SAEs                                                            |
| [57]      | ClbR              | R (maint) vs Obs       | 34.9 months      | Age ≥ 60<br>Median age: 70 (61-84)<br>CR, CRi or PR after induction                            | 66 randomized to R or Obs post-induction                 | ORR: 55.9% vs 34.4%<br>$P = 0.079$<br><br>(Among 50 PR/nPR randomized after induction, ORR: 56.7% vs 26.7% $p = 0.027$ ) | Median: 38.2 vs 34.7 months<br><br>At 3 years: 48.6% vs 31.8%<br><br>$p = 0.07$ | N/R                                 | SAEs equal across both arms; only one R-related event (neutropenia) |

| Reference | Induction Therapy | Maintenance Therapy | Median Follow up | Patients                                                      | N                                                 | Response                                                                                                        | PFS                                         | OS                   | Toxicity (Grade ≥ 3)                                                                |
|-----------|-------------------|---------------------|------------------|---------------------------------------------------------------|---------------------------------------------------|-----------------------------------------------------------------------------------------------------------------|---------------------------------------------|----------------------|-------------------------------------------------------------------------------------|
| [58]      | FR (4 cycles)     | A (con)             | 41 months        | Median age: 60 (40-80) Rai II-IV requiring treatment ECOG 0-2 | 34 started Ale, only 20 completed prescribed dose | ORR: 76%<br>CR: 21%                                                                                             | Median: 42 months<br><br>At 4 years: 47%    | At 4 Years: 82%      | Neutropenia: 12%<br>Thrombocytopenia: 9%<br>Infusion-related: 21%<br>Infection: 21% |
| [59, 60]  | FR                | A (con)             | 36 months        | CR, PR or SD after induction                                  | 58 received A consolidation                       | ORR: 90%<br>CR: 57%<br><br>61% of patients achieving PR after induction attained CR after A; 42% became MRD-neg | Median: 36 months<br>2 years: 72%           | 2 years: 86%         | 7 patient deaths due to infection following A consolidation                         |
| [61]      | PCOf              | Of (con)            | 33 months        | ECOG 0-2 CR or PR after induction                             | 28                                                | ORR: 96%<br>CR:32%<br><br>25% had improvement in depth of response after Of con                                 | Median TFS: NR<br><br>TFS at 36 months: 84% | N/R                  | 2 deaths due to sepsis<br><br>Neutropenia: 42%<br>Infection: 6%                     |
| [62]      | PCR               | Len (con)           | 37 months        |                                                               | 34 initiated Len consolidation                    | 24% improved response with Len<br><br>CR: 38.3 after induction to 52.99 after Len                               | Median TFS: NR<br><br>TFS at 37 months: 75% | At 37 months : 86.4% | Hematologic toxicity : 65%                                                          |

A, alemtuzumab; ClbR, chlorambucil+rituximab; Con, consolidation; CR, complete response rate; Cri, complete response with incomplete blood count recovery; FCR-M, fludarabine+cyclophosphamide+rituximab+mitoxantrone; FR, fludarabine+rituximab; Len, lenalidomide; Maint, maintenance; N, number of patients; N/R, not reported; NR, not reached; Obs, observation; Of, ofatumumab; ORR, overall response rate; OS, overall survival; PCOf, pentostatin+cyclophosphamide+ofatumumab; PFS, progression free survival; PR, partial response rate; R, rituximab; TFS, treatment-free survival

### Supplemental Table 6: RCTs – Autologous Transplant After First-line Treatment

| Reference | Patients                                                     | Treatment                                                 | N   | EFS                                       | OS                                         | Toxicity (Grade ≥ 3)                                                                       |
|-----------|--------------------------------------------------------------|-----------------------------------------------------------|-----|-------------------------------------------|--------------------------------------------|--------------------------------------------------------------------------------------------|
| [63]      | 1st and 2nd line, response after induction                   | After 1st or 2nd line treatment (various):<br>Obs vs ASCT | 223 | 5 years: 24% vs 42%<br>$p < 0.001$        | 5 years: 84.3% vs 85.5%<br>NS              | Low rates of grade3/4 toxicity in each group                                               |
| [64]      | 1st line, CR after induction                                 | CHOP/F -> Obs vs CHOP/F -> ASCT                           | 105 | 3 years: 35.5% vs 79.8%<br>$p = 0.003$    | 3 years: 97.8% vs 95.7%<br>NS              | Low rates of grade3/4 toxicity in each group                                               |
| [64]      | 1st line, PR after induction                                 | CHOP/F -> DHAP -> FC vs CHOP/F -> DHAP -> ASCT            | 94  | 3 years: 48.9% vs 44.4%<br>NS             | 3 years: 87.0% vs 81.7%<br>NS              | Low rates of grade3/4 toxicity in each group                                               |
| [65]      | 1st line, CR after induction                                 | CHOP + CHOP maintenance vs CHOP + ASCT                    | 82  | Median: 22 vs 53 months<br>$p < 0.0001$   | Median: 104.7 months vs 107.4 months<br>NS | Secondary malignancies: 15% vs 13%<br><br>Infection: 11.5% vs 34.5% (1 fatal) $p = N/R$    |
| [66]      | < 65 years Binet Stage B or C 1st line treatment + con/maint | FCR + R maintenance vs FCR + (HDT + ASCT)                 | 96  | 5 years: 65.1 months vs 60.4 months<br>NS | 5 years: 88.1% vs 88%<br>NS                | Bacterial infection: 19% vs 35.4%<br>$p = 0.067$<br><br>Treatment related deaths: 6% vs 6% |

ASCT, autologous stem cell transplant; CHOP, cyclophosphamide+vincristine+prednisone+doxorubicin; Con, consolidation; CR, complete response rate; EFS, event-free survival; FCR, fludarabine+cyclophosphamide+rituximab; HDT, high-dose therapy; Maint, maintenance; N/R, not reported; NS, not significant; Obs, observation; OS, overall survival; PR, partial response rate RCT, randomized controlled trial.

1. Hallek, M., et al., *Addition of rituximab to fludarabine and cyclophosphamide in patients with chronic lymphocytic leukaemia: a randomised, open-label, phase 3 trial*. Lancet, 2010. **376**(9747): p. 1164-74.
2. Eichhorst, B., et al., *First-line chemoimmunotherapy with bendamustine and rituximab versus fludarabine, cyclophosphamide, and rituximab in patients with advanced chronic lymphocytic leukaemia (CLL10): an international, open-label, randomised, phase 3, non-inferiority trial*. Lancet Oncol, 2016. **17**(7): p. 928-42.
3. Goede, V., et al., *Interactions between comorbidity and treatment of chronic lymphocytic leukemia: results of German Chronic Lymphocytic Leukemia Study Group trials*. Haematologica, 2014. **99**(6): p. 1095-100.
4. Woyach, J.A., et al., *Impact of age on outcomes after initial therapy with chemotherapy and different chemoimmunotherapy regimens in patients with chronic lymphocytic leukemia: results of sequential cancer and leukemia group B studies*. J Clin Oncol, 2013. **31**(4): p. 440-7.
5. Tam, C.S., et al., *Long-term results of the fludarabine, cyclophosphamide, and rituximab regimen as initial therapy of chronic lymphocytic leukemia*. Blood, 2008. **112**(4): p. 975-80.
6. Keating, M.J., et al., *Early results of a chemoimmunotherapy regimen of fludarabine, cyclophosphamide, and rituximab as initial therapy for chronic lymphocytic leukemia*. J Clin Oncol, 2005. **23**(18): p. 4079-88.
7. Martell, R.E., et al., *Analysis of age, estimated creatinine clearance and pretreatment hematologic parameters as predictors of fludarabine toxicity in patients treated for chronic lymphocytic leukemia: a CALGB (9011) coordinated intergroup study*. Cancer Chemother Pharmacol, 2002. **50**(1): p. 37-45.
8. Fischer, K., et al., *Bendamustine in combination with rituximab for previously untreated patients with chronic lymphocytic leukemia: a multicenter phase II trial of the German Chronic Lymphocytic Leukemia Study Group*. J Clin Oncol, 2012. **30**(26): p. 3209-16.
9. Kay, N.E., et al., *Combination chemoimmunotherapy with pentostatin, cyclophosphamide, and rituximab shows significant clinical activity with low accompanying toxicity in previously untreated B chronic lymphocytic leukemia*. Blood, 2007. **109**(2): p. 405-11.
10. Shanafelt, T.D., et al., *Pentostatin, cyclophosphamide, and rituximab regimen in older patients with chronic lymphocytic leukemia*. Cancer, 2007. **109**(11): p. 2291-8.
11. Rai, K.R., et al., *Fludarabine compared with chlorambucil as primary therapy for chronic lymphocytic leukemia*. N Engl J Med, 2000. **343**(24): p. 1750-7.
12. Rai, K.R., et al., *Long-Term Survival Analysis of the North American Intergroup Study C9011 Comparing Fludarabine (F) and Chlorambucil (C) in Previously Untreated Patients with Chronic Lymphocytic Leukemia (CLL)*. ASH Annual Meeting Abstracts, 2009. **114**(22): p. 536-.
13. Morrison, V.A., et al., *Impact of therapy With chlorambucil, fludarabine, or fludarabine plus chlorambucil on infections in patients with chronic lymphocytic leukemia: Intergroup Study Cancer and Leukemia Group B 9011*. J Clin Oncol, 2001. **19**(16): p. 3611-21.



14. Catovsky, D., et al., *Assessment of fludarabine plus cyclophosphamide for patients with chronic lymphocytic leukaemia (the LRF CLL4 Trial): a randomised controlled trial*. Lancet, 2007. **370**(9583): p. 230-9.
15. Flinn, I.W., et al., *Phase III trial of fludarabine plus cyclophosphamide compared with fludarabine for patients with previously untreated chronic lymphocytic leukemia: US Intergroup Trial E2997*. J Clin Oncol, 2007. **25**(7): p. 793-8.
16. Eichhorst, B.F., et al., *Fludarabine plus cyclophosphamide versus fludarabine alone in first-line therapy of younger patients with chronic lymphocytic leukemia*. Blood, 2006. **107**(3): p. 885-91.
17. Eichhorst, B.F., et al., *First-line therapy with fludarabine compared with chlorambucil does not result in a major benefit for elderly patients with advanced chronic lymphocytic leukemia*. Blood, 2009. **114**(16): p. 3382-91.
18. Knauf, W.U., et al., *Phase III randomized study of bendamustine compared with chlorambucil in previously untreated patients with chronic lymphocytic leukemia*. J Clin Oncol, 2009. **27**(26): p. 4378-84.
19. Knauf, W.U., et al., *Bendamustine compared with chlorambucil in previously untreated patients with chronic lymphocytic leukaemia: updated results of a randomized phase III trial*. Br J Haematol, 2012. **159**(1): p. 67-77.
20. Leporrier, M., et al., *Randomized comparison of fludarabine, CAP, and ChOP in 938 previously untreated stage B and C chronic lymphocytic leukemia patients*. Blood, 2001. **98**(8): p. 2319-25.
21. Mabed, M., et al., *Chlorambucil plus theophylline vs chlorambucil alone as a front line therapy for B-cell chronic lymphatic leukemia*. Leuk Lymphoma, 2004. **45**(10): p. 2029-35.
22. Robak, T., et al., *Cladribine alone and in combination with cyclophosphamide or cyclophosphamide plus mitoxantrone in the treatment of progressive chronic lymphocytic leukemia: report of a prospective, multicenter, randomized trial of the Polish Adult Leukemia Group (PALG CLL2)*. Blood, 2006. **108**(2): p. 473-9.
23. Robak, T., et al., *Long-term results of the Polish Adult Leukemia Group PALG-CLL2 phase III randomized study comparing cladribine-based combinations in chronic lymphocytic leukemia*. Leuk Lymphoma, 2014. **55**(3): p. 606-10.
24. Robak, T., et al., *Cladribine with prednisone versus chlorambucil with prednisone as first-line therapy in chronic lymphocytic leukemia: report of a prospective, randomized, multicenter trial*. Blood, 2000. **96**(8): p. 2723-9.
25. Robak, T., et al., *Comparison of cladribine plus cyclophosphamide with fludarabine plus cyclophosphamide as first-line therapy for chronic lymphocytic leukemia: a phase III randomized study by the Polish Adult Leukemia Group (PALG-CLL3 Study)*. J Clin Oncol, 2010. **28**(11): p. 1863-9.
26. Hillmen, P., et al., *Alemtuzumab compared with chlorambucil as first-line therapy for chronic lymphocytic leukemia*. J Clin Oncol, 2007. **25**(35): p. 5616-23.
27. Thompson, P.A., et al., *Fludarabine, cyclophosphamide and rituximab achieves long-term disease-free survival in IGHV-mutated chronic lymphocytic leukemia*. Blood, 2015.
28. Foon, K.A., et al., *Chemoimmunotherapy With Low-Dose Fludarabine and Cyclophosphamide and High Dose Rituximab in Previously Untreated Patients With Chronic Lymphocytic Leukemia*. Journal of Clinical Oncology, 2009. **27**(4): p. 498-503.
29. Foon, K.A., et al., *Long-term results of chemoimmunotherapy with low-dose fludarabine, cyclophosphamide and high-dose rituximab as initial treatment for patients with chronic lymphocytic leukemia*. Blood, 2012. **119**(13): p. 3184-3185.

30. Mato, A.R., et al., *Reduced-dose fludarabine, cyclophosphamide, and rituximab (FCR-Lite) plus lenalidomide, followed by lenalidomide consolidation/maintenance, in previously untreated chronic lymphocytic leukemia*. *Am J Hematol*, 2015. **90**(6): p. 487-92.
31. Strati, P., et al., *Fludarabine, cyclophosphamide and rituximab plus granulocyte macrophage colony-stimulating factor as frontline treatment for patients with chronic lymphocytic leukemia*. *Leuk Lymphoma*, 2014. **55**(4): p. 828-33.
32. Faderl, S., et al., *Fludarabine, cyclophosphamide, mitoxantrone plus rituximab (FCM-R) in frontline CLL <70 Years*. *Leuk Res*, 2010. **34**(3): p. 284-8.
33. Parikh, S.A., et al., *Frontline chemoimmunotherapy with fludarabine, cyclophosphamide, alemtuzumab, and rituximab for high-risk chronic lymphocytic leukemia*. *Blood*, 2011. **118**(8): p. 2062-8.
34. Chow, K.U., et al., *Clinical efficacy of immunochemotherapy with fludarabine, epirubicin and rituximab in the treatment for chronic lymphocytic leukaemia and prolymphocytic leukaemia*. *Eur J Haematol*, 2011. **87**(5): p. 426-33.
35. Byrd, J.C., et al., *Randomized phase 2 study of fludarabine with concurrent versus sequential treatment with rituximab in symptomatic, untreated patients with B-cell chronic lymphocytic leukemia: results from Cancer and Leukemia Group B 9712 (CALGB 9712)*. *Blood*, 2003. **101**(1): p. 6-14.
36. Woyach, J.A., et al., *Chemoimmunotherapy with fludarabine and rituximab produces extended overall survival and progression-free survival in chronic lymphocytic leukemia: long-term follow-up of CALGB study 9712*. *J Clin Oncol*, 2011. **29**(10): p. 1349-55.
37. Mauro, F.R., et al., *Fludarabine plus alemtuzumab (FA) front-line treatment in young patients with chronic lymphocytic leukemia (CLL) and an adverse biologic profile*. *Leuk Res*, 2014. **38**(2): p. 198-203.
38. Shanafelt, T., et al., *Ofatumumab-based chemoimmunotherapy is effective and well tolerated in patients with previously untreated chronic lymphocytic leukemia (CLL)*. *Cancer*, 2013. **119**(21): p. 3788-96.
39. Tedeschi, A., et al., *A phase II multi-center trial of pentostatin plus cyclophosphamide with ofatumumab in older previously untreated chronic lymphocytic leukemia patients*. *Haematologica*, 2015. **100**(12): p. e501-4.
40. Kay, N.E., et al., *Pentostatin and rituximab therapy for previously untreated patients with B-cell chronic lymphocytic leukemia*. *Cancer*, 2010. **116**(9): p. 2180-7.
41. Hillmen, P., et al., *Rituximab plus chlorambucil as first-line treatment for chronic lymphocytic leukemia: Final analysis of an open-label phase II study*. *J Clin Oncol*, 2014. **32**(12): p. 1236-41.
42. Strati, P., et al., *A phase II study of the combination of rituximab and granulocyte macrophage colony stimulating factor as treatment of patients with chronic lymphocytic leukemia*. *Leukemia & Lymphoma*, 2015. **56**(6): p. 1878-80.
43. Byrd, J.C., et al., *Randomized phase 2 study of obinutuzumab monotherapy in symptomatic, previously untreated chronic lymphocytic leukemia*. *Blood*, 2016. **127**(1): p. 79-86.
44. Zent, C.S., et al., *A phase II randomized trial comparing standard and low dose rituximab combined with alemtuzumab as initial treatment of progressive chronic lymphocytic leukemia in older patients: a trial of the ECOG-ACRIN cancer research group (E1908)*. *Am J Hematol*, 2016. **91**(3): p. 308-12.
45. Frankfurt, O., et al., *Phase II study of alemtuzumab-rituximab therapy in previously untreated patients with chronic lymphocytic leukemia: short- and long-term outcomes*. *Leuk Lymphoma*, 2015. **56**(2): p. 315-23.

46. Badoux, X.C., et al., *Lenalidomide as initial therapy of elderly patients with chronic lymphocytic leukemia*. *Blood*, 2011. **118**(13): p. 3489-98.
47. Strati, P., et al., *Lenalidomide induces long-lasting responses in elderly patients with chronic lymphocytic leukemia*. *Blood*, 2013. **122**(5): p. 734-7.
48. Chen, C.I., et al., *Single-agent lenalidomide in the treatment of previously untreated chronic lymphocytic leukemia*. *J Clin Oncol*, 2011. **29**(9): p. 1175-81.
49. Chen, C.I., et al., *Long-term follow-up of a phase 2 trial of single agent lenalidomide in previously untreated patients with chronic lymphocytic leukaemia*. *Br J Haematol*, 2014. **165**(5): p. 731-3.
50. James, D.F., et al., *Lenalidomide and rituximab for the initial treatment of patients with chronic lymphocytic leukemia: a multicenter clinical-translational study from the chronic lymphocytic leukemia research consortium*. *J Clin Oncol*, 2014. **32**(19): p. 2067-73.
51. Greil, R., et al., *Rituximab maintenance versus observation alone in patients with chronic lymphocytic leukaemia who respond to first-line or second-line rituximab-containing chemoimmunotherapy: final results of the AGMT CLL-8a Mabtenance randomised trial*. *Lancet Haematol*, 2016. **3**(7): p. e317-29.
52. Dartigeas C, V.D.N.E., Maisonneuve H, Berthou C, Dilhuydy MS, De Guibert S, Stephane Leprêtre, Philippe Rodon, Therese Aurrant, Jean-Pierre Vilque, Beatrice Mahe, Marie C. Bene, Florence NGuyen-Khac, Remi Letestu, Alain Delmer, Pierre Feugier, Vincent Levy, Julie Leger, Philippe Colombat, Veronique Leblond, *Rituximab maintenance after induction with abbreviated FCR in previously untreated elderly (≥ 65 years) CLL patients: Results of the randomized CLL 2007 SA trial from the French FILO Group (NCT00645606)*. *J Clin Oncol* 34, (suppl; abstr 7505), 2016.
53. Fink, A.M., et al., *Lenalidomide maintenance after first-line therapy for high-risk chronic lymphocytic leukaemia (CLLM1): final results from a randomised, double-blind, phase 3 study*. *Lancet Haematol*, 2017. **4**(10): p. e475-e486.
54. Abrisqueta, P., et al., *Rituximab maintenance after first-line therapy with rituximab, fludarabine, cyclophosphamide, and mitoxantrone (R-FCM) for chronic lymphocytic leukemia*. *Blood*, 2013. **122**(24): p. 3951-9.
55. Bosch, F., et al., *Rituximab, fludarabine, cyclophosphamide, and mitoxantrone: a new, highly active chemoimmunotherapy regimen for chronic lymphocytic leukemia*. *J Clin Oncol*, 2009. **27**(27): p. 4578-84.
56. Del Poeta, G., et al., *Consolidation and maintenance immunotherapy with rituximab improve clinical outcome in patients with B-cell chronic lymphocytic leukemia*. *Cancer*, 2008. **112**(1): p. 119-28.
57. Foa, R., et al., *Chlorambucil plus rituximab with or without maintenance rituximab as first-line treatment for elderly chronic lymphocytic leukemia patients*. *Am J Hematol*, 2014. **89**(5): p. 480-6.
58. Hainsworth, J.D., et al., *Combination therapy with fludarabine and rituximab followed by alemtuzumab in the first-line treatment of patients with chronic lymphocytic leukemia or small lymphocytic lymphoma: a phase 2 trial of the Minnie Pearl Cancer Research Network*. *Cancer*, 2008. **112**(6): p. 1288-95.
59. Jones, J.A., et al., *Patients with chronic lymphocytic leukemia with high-risk genomic features have inferior outcome on successive Cancer and Leukemia Group B trials with alemtuzumab consolidation: subgroup analysis from CALGB 19901 and CALGB 10101*. *Leuk Lymphoma*, 2013. **54**(12): p. 2654-9.

60. Lin, T.S., et al., *Consolidation therapy with subcutaneous alemtuzumab after fludarabine and rituximab induction therapy for previously untreated chronic lymphocytic leukemia: final analysis of CALGB 10101*. J Clin Oncol, 2010. **28**(29): p. 4500-6.
61. Strati, P., et al., *Ofatumumab monotherapy as a consolidation strategy in patients with previously untreated chronic lymphocytic leukaemia: a phase 2 trial*. Lancet Haematol, 2016. **3**(9): p. e407-14.
62. Shanafelt, T.D., et al., *Long-term repair of T-cell synapse activity in a phase II trial of chemoimmunotherapy followed by lenalidomide consolidation in previously untreated chronic lymphocytic leukemia (CLL)*. Blood, 2013. **121**(20): p. 4137-41.
63. Michallet, M., et al., *Autologous hematopoietic stem cell transplantation in chronic lymphocytic leukemia: results of European intergroup randomized trial comparing autografting versus observation*. Blood, 2011. **117**(5): p. 1516-21.
64. Sutton, L., et al., *Autologous stem cell transplantation as a first-line treatment strategy for chronic lymphocytic leukemia: a multicenter, randomized, controlled trial from the SFGM-TC and GFLLC*. Blood, 2011. **117**(23): p. 6109-19.
65. Brion, A., et al., *Autologous transplantation in CLL patients with B and C Binet stages: final results of the prospective randomized GOELAMS LLC 98 trial*. Bone Marrow Transplant, 2012. **47**(4): p. 542-8.
66. Magni, M., et al., *Results of a randomized trial comparing high-dose chemotherapy plus Auto-SCT and R-FC in CLL at diagnosis*. Bone Marrow Transplant, 2014. **49**(4): p. 485-491.
